# Supplementary material
Source: HighWire-hosted journal article supplement (https://cmaj.ca/highwire/filestream/70687/field_highwire_adjunct_files/6/171391-res-4-at.pdf)
Supplement: 171391-res-4-at.pdf [file 171391-res-4-at.pdf]

**Appendix 4 (as supplied by the authors)**  
Study characteristics (n = 25)

| <b>First author, Year</b><br>(Country); <u>Study period</u>                                                   | <b>Patient characteristics</b><br>(patient criteria, sample size, mean age [SD]) <b>and Setting</b>                                                                                                                                                                          | <b>Study design</b>                     | <b>Cochrane outcome category investigated:</b><br>study outcomes                                                                                                                                                  | <b>Disease cluster investigated</b> | <b>Intervention vs. Comparator</b> (if applicable)                                                     | <b>Intervention category(ies):</b><br><i>elements</i>                                                                                                      | <b>Follow-up</b> |
|---------------------------------------------------------------------------------------------------------------|------------------------------------------------------------------------------------------------------------------------------------------------------------------------------------------------------------------------------------------------------------------------------|-----------------------------------------|-------------------------------------------------------------------------------------------------------------------------------------------------------------------------------------------------------------------|-------------------------------------|--------------------------------------------------------------------------------------------------------|------------------------------------------------------------------------------------------------------------------------------------------------------------|------------------|
| <b>Alexopoulos GS,<sup>33</sup></b><br>2014 (USA)<br><br><u>Study period</u><br>Not reported                  | <b>Patient criteria:</b> i) Diagnosed with COPD, and met DSM-IV criteria for unipolar major depression; ii) Score $\geq 14$ on HAM-D<br><b>Sample size:</b> 138<br><b>Mean age (SD):</b> NR (NR)<br><b>Setting:</b> Acute inpatient pulmonary rehabilitation unit            | RCT                                     | <b>Health behaviour:</b><br>Compliance<br><b>Health behaviour:</b><br>Health enhancing lifestyle or behaviour<br><b>Treatment:</b> Adverse outcomes<br><b>Treatment:</b> Clinical assessment                      | COPD + Depression                   | Personalized Intervention for Depressed Patients with COPD (PID-C) vs. Usual care                      | <b>Coordination of care; Education:</b> <i>CM + ED (Pt) + FR</i>                                                                                           | 28 weeks         |
| <b>Alexopoulos GS,<sup>34</sup></b><br>2016<br><br><u>Study period</u><br>Not reported                        | <b>Patient criteria:</b> i) Diagnosed with COPD, and met DSM-IV criteria for unipolar major depression; ii) Score $\geq 20$ on HAM-D<br><b>Sample size:</b> 101<br><b>Mean age (SD):</b> NR (NR)<br><b>Setting:</b> Acute inpatient pulmonary rehabilitation unit; community | RCT                                     | <b>Treatment:</b> Adverse outcomes<br><b>Treatment:</b> Clinical assessment                                                                                                                                       | COPD + Depression                   | Personalized Intervention for Depressed Patients with COPD (PID-C) vs. Problem Solving-Adherence (PSA) | <b>Coordination of care; Education:</b> <i>CM + ED (Pt) + FR</i><br><b>Coordination of care; Education; Self-Management:</b> <i>CM + ED (Pt) + FR + SM</i> | 26 weeks         |
| <b>Becker A,<sup>35</sup></b><br>2011 (Germany)<br><br><u>Study period</u><br>Not reported                    | <b>Patient criteria:</b> coronary heart disease (CHD), diabetes, or both<br><b>Sample size:</b> 79<br><b>Mean age (SD):</b> 64.5 (12.1)<br><b>Setting:</b> Five general practitioners in rural areas around Marburg, Germany                                                 | Mixed-methods (pre-/post + qualitative) | <b>Evaluation of care:</b><br>Perceptions and ratings of care or interventions<br><b>Health behavior:</b><br>Attitudes<br><b>Skills acquisition:</b> Self-care skills                                             | CVD + Diabetes                      | Computer-based Counseling system (CBCS)                                                                | <b>Information and health technology; Education; Self-management:</b> <i>ED (Pt) + SM</i>                                                                  | 6 weeks          |
| <b>Begrambekova YL,<sup>36</sup></b><br>2015 (Russian Federation)<br><br><u>Study period:</u><br>Not reported | <b>Patient criteria:</b> Patients with CHF and depression<br><b>Sample size:</b> 253<br><b>Mean age (SD):</b> 65 (10.2)<br><b>Setting:</b> Inpatient                                                                                                                         | RCT                                     | <b>Treatment:</b> Adverse outcomes ( <i>Mortality</i> )<br><b>Treatment:</b> Adverse outcomes ( <i>Composite of all-cause mortality and hospitalization</i> )                                                     | CHF + Depression                    | Disease Management Program (DMP) vs. Control                                                           | <b>Coordination of care; Education; Self-management:</b> <i>DM + ED (Pt) + SM</i>                                                                          | 52 weeks         |
| <b>Bernocchi P,<sup>38</sup></b> 2018<br><br><u>Study period:</u><br>July 2013 – April 2015                   | <b>Patient criteria:</b> i) Diagnosed with CHF and COPD, ii) Living at home, iii) Cognitively intact (Mini Mental Test Examination 16 or greater), iv) no physical activity limitations, v) expected to live 6 months or more                                                | RCT                                     | <b>Treatment:</b> Clinical Assessments<br><b>Health Service Delivery:</b><br>Service utilization<br><b>Health Status and Wellbeing:</b> Physical health of patient<br><b>Skills acquisition:</b> Self-care skills | COPD + Depression                   | Integrated telerehabilitation home-based program (Telereab-HBP) vs. Standard Care                      | <b>Coordination of Care; Information and communication technology (ICT); Education;</b> <i>DM + ED (Pt) + TH + TM</i>                                      | 6 months         |

Appendix to: Kastner M, Cardoso R, Lai Y, et al. Effectiveness of interventions for managing multiple high-burden chronic diseases in older adults: a systematic review and meta-analysis. *CMAJ* 2018. doi: 10.1503/cmaj.171391

Copyright © 2018 The Author(s) or their employer(s).

To receive this resource in an accessible format, please contact us at [cmajgroup@cmaj.ca](mailto:cmajgroup@cmaj.ca).

|                                                                                            |                                                                                                                                                                                                                                                                                                                                                                                                                                                                                         |     |                                                                                                                                                                                                                                                   |                              |                                                                                                             |                                                                               |                |
|--------------------------------------------------------------------------------------------|-----------------------------------------------------------------------------------------------------------------------------------------------------------------------------------------------------------------------------------------------------------------------------------------------------------------------------------------------------------------------------------------------------------------------------------------------------------------------------------------|-----|---------------------------------------------------------------------------------------------------------------------------------------------------------------------------------------------------------------------------------------------------|------------------------------|-------------------------------------------------------------------------------------------------------------|-------------------------------------------------------------------------------|----------------|
|                                                                                            | <b>Sample size:</b> 112<br><b>Mean age (SD):</b> 70 (9)<br><b>Setting:</b> Community setting; hospital                                                                                                                                                                                                                                                                                                                                                                                  |     |                                                                                                                                                                                                                                                   |                              |                                                                                                             |                                                                               |                |
| <b>Bowles KH,<sup>39</sup> 2009</b><br>(USA)<br><br><u>Study period</u><br>Not reported    | <b>Patient criteria:</b> i) Diagnosed with heart failure or diabetes as one of two main diagnoses, and receiving home care; ii) Age $\geq$ 55 years; iii) Cognitively intact; iv) Can see and hear well enough to use equipment; v) English speaking, and has conventional (fixed) telephone.<br><b>Sample size:</b> 303<br><b>Mean age (SD):</b> 75 (NR)<br><b>Setting:</b> Four home care agencies in Pennsylvania ranging in size from 5000 to 16000 patients/year, most being rural | RCT | <b>Health status and well being:</b> Physical health of patient or caregiver<br><b>Health service delivery:</b> Service utilization<br><b>Knowledge and understanding:</b> Patient knowledge acquisition<br><b>Treatment:</b> Clinical assessment | CHF + Diabetes               | Telephone (in-person visits + telephone) vs. TM (in-person visits + TM) vs. Control (in-person visits only) | <b>Information and health technology; Education:</b> <i>DM + ED (Pr) + TM</i> | 60 and 90 days |
| <b>Brodaty H,<sup>40</sup> 2003</b> (Australia)<br><br><u>Study period</u><br>Not reported | <b>Patient criteria:</b> i) Residing in nursing home for at least one month; ii) Significant cognitive impairment (AMTS score $\leq$ 7); iii) At least three depressive symptoms on the EBAS-DEP or defined psychotic symptoms on the BEHAVE-AD; iv) Reach predetermined cutoff criteria (Table 1) on at least two depression scales or two psychosis scales.<br><b>Sample size:</b> 86<br><b>Mean age (SD):</b> 82.9 (8.89)<br><b>Setting:</b> 11 nursing homes in Sydney, Australia   | RCT | <b>Treatment:</b> Clinical assessment                                                                                                                                                                                                             | Dementia + Depression        | Psychogeriatric Case Management vs. Consultative general practice vs. Control                               | <b>Coordination of care; Education:</b> <i>CM + CP + ED (Pr) + TEAM</i>       | 12 weeks       |
| <b>Doyle C,<sup>41</sup> 2017</b><br><br><u>Study period</u><br>Jan 2012 – Dec 2014        | <b>Patient criteria:</b> i) COPD, ii) 45 years or older, iii) scored 8 or more on the HADS or 10 or more on the PHQ-9, iv) could hear over the phone<br><b>Sample size:</b> 110<br><b>Mean age (SD):</b> 68.5 (9.4)<br><b>Setting:</b> telephone                                                                                                                                                                                                                                        | RCT | <b>Treatment:</b> Clinical assessments<br><br><b>Health Status and well being:</b> Physical Health of Patient<br><br><b>Skills acquisition:</b> Self-care skills                                                                                  | COPD + depression or anxiety | Telephone-administered CBT Vs. Telephone-administered Befriending                                           | <b>Cognitive-behavioural:</b> <i>DM (psychosocial) + SM + TH</i>              | 8 weeks        |
| <b>Kiosses DN<sup>43</sup> 2015</b> (USA)<br><br><u>Study period</u><br>Not reported       | <b>Patient criteria:</b> Major depression and mild or moderate dementia<br><b>Sample size:</b> 39<br><b>Mean age (SD):</b> 82.5 (7.16)<br><b>Setting:</b> Community agencies of the Weill                                                                                                                                                                                                                                                                                               | RCT | <b>Treatment:</b> Clinical assessments                                                                                                                                                                                                            | Depression + Dementia        | Problem Adaptation Therapy (PATH) vs. Supportive Therapy for Cognitively Impaired Older Adults (ST-CI)      | <b>Cognitive-behavioural:</b> <i>DM (psychosocial) + SM</i>                   | 12 weeks       |

|                                                                                              |                                                                                                                                                                                                                                                                                                                                                                                                                                                                                     |             |                                                                                                                                                                                 |                        |                                                                   |                                                                                         |          |
|----------------------------------------------------------------------------------------------|-------------------------------------------------------------------------------------------------------------------------------------------------------------------------------------------------------------------------------------------------------------------------------------------------------------------------------------------------------------------------------------------------------------------------------------------------------------------------------------|-------------|---------------------------------------------------------------------------------------------------------------------------------------------------------------------------------|------------------------|-------------------------------------------------------------------|-----------------------------------------------------------------------------------------|----------|
|                                                                                              | Cornell Institute of Geriatric Psychiatry at a University hospital in NY, USA.                                                                                                                                                                                                                                                                                                                                                                                                      |             |                                                                                                                                                                                 |                        |                                                                   |                                                                                         |          |
| <b>Lamers F,</b> <sup>44</sup><br>2010 (Netherlands)<br><br><u>Study period</u><br>2 years   | <b>Patient criteria:</b> i) Diagnosed with Type 2 diabetes mellitus or COPD; ii) Minor depression, mild-to-moderate major depression or dysthymia (according to MINI); iii) Self-reporting at least two symptoms, loss of interest or depressed mood, present for more than half of the days; iv) Age $\geq$ 60 years, and community-dwelling.<br><b>Sample size:</b> 361<br><b>Mean age (SD):</b> NR (NR)<br><b>Setting:</b> 89 primary care practices in the south of Netherlands | RCT         | <b>Health status and well-being:</b> Psychosocial outcomes<br><b>Treatment:</b> Clinical assessment                                                                             | Depression + Diabetes  | Nurse-led Minimal Psychological Intervention (MPI) vs. Usual care | <b>Cognitive-behavioural; Education; Self-management:</b><br><i>ED (Pr) + SM (Home)</i> | 36 weeks |
| <b>Lin EHB,</b> <sup>45</sup><br>2003 (USA)<br><br><u>Study period</u><br>1999 – 2001        | <b>Patient criteria:</b> i) Major depression or dysthymia (according to DSM-IV); ii) Age $\geq$ 60 years; iii) Expects to use one participating primary care clinic as main source of general medical services over one year.<br><b>Sample size:</b> 1001<br><b>Mean age (SD):</b> 72 (7.4)<br><b>Setting:</b> 18 primary care clinics from eight health care organizations in five states across the United States                                                                 | RCT         | <b>Health status and well-being:</b> Physical health of patient<br><b>Health status and well-being:</b> Psychosocial outcomes<br><b>Treatment outcomes:</b> Clinical assessment | Arthritis + Depression | IMPACT Intervention (collaborative care approach) vs. Usual care  | <b>Coordination of care:</b> <i>CM + DM + TEAM</i>                                      | 52 weeks |
| <b>Martin-Lesende I,</b> <sup>46</sup><br>2013 (Spain)<br><br><u>Study period</u><br>Unclear | <b>Patient criteria:</b> i) Diagnosed with HF and/or CLD; ii) At least two hospital admissions in previous year, with at least one admission associated with the two conditions of interest; iii) Age $\geq$ 14 years; iv) Receiving home care due to lack of or severe difficulties with mobility.<br><b>Sample size:</b> 58<br><b>Mean age (SD):</b> 81 (7.5)<br><b>Setting:</b> 20 health centres in Bilbao                                                                      | RCT         | <b>Health service delivery:</b> Service utilization<br><b>Treatment outcomes:</b> Adverse outcomes                                                                              | CHF + COPD             | Home telemonitoring vs. Standard care                             | <b>Information and health technology; Education:</b><br><i>ED + TM</i>                  | 52 weeks |
| <b>McSweeney K,</b> <sup>47</sup> 2011 (Australia)<br><br><u>Study period</u>                | <b>Patient criteria:</b> All permanent residents.<br><b>Sample size:</b> 44                                                                                                                                                                                                                                                                                                                                                                                                         | Cluster RCT | <b>Treatment outcomes:</b> Clinical assessment                                                                                                                                  | Dementia + Depression  | Specialist multidisciplinary consultation vs. Usual care          | <b>Coordination of care:</b> <i>CP + TEAM</i>                                           | 15 weeks |

|                                                                                                   |                                                                                                                                                                                                                                                                                                                                                                 |               |                                                                                                                                                                                                                                                                                              |                                             |                                                                                 |                                                                                               |           |
|---------------------------------------------------------------------------------------------------|-----------------------------------------------------------------------------------------------------------------------------------------------------------------------------------------------------------------------------------------------------------------------------------------------------------------------------------------------------------------|---------------|----------------------------------------------------------------------------------------------------------------------------------------------------------------------------------------------------------------------------------------------------------------------------------------------|---------------------------------------------|---------------------------------------------------------------------------------|-----------------------------------------------------------------------------------------------|-----------|
| NR                                                                                                | <b>Mean age (SD):</b> 86.49 (6.95)<br><b>Setting:</b> Aged care facilities                                                                                                                                                                                                                                                                                      |               |                                                                                                                                                                                                                                                                                              |                                             |                                                                                 |                                                                                               |           |
| <b>Morgan MA,</b> <sup>48</sup> 2013 (Australia)<br><br><u>Study period</u><br>NR                 | <b>Patient criteria:</b> i) Patients with CHD and/or Type 2 diabetes mellitus; ii) Clinic has practice nurse (PN) to provide the collaborative care and can identify eligible registered patients.<br><b>Sample size:</b> 317<br><b>Mean age (SD):</b> NR (NR)<br><b>Setting:</b> Primary care practices                                                        | Cluster RCT   | <b>Health behavior:</b> Compliance<br><b>Health behaviour:</b> Health enhancing lifestyle or behavioural outcomes<br><b>Knowledge and understanding:</b> Provider level of knowledge or skills<br><b>Treatment:</b> Clinical assessment<br><b>Treatment:</b> Physiological measures          | CVD + Diabetes                              | TrueBlue Model of Collaborative Care (nurse-led collaborative care) vs. Control | <b>Coordination of care; Education; Self-management:</b> <i>CM + CP + ED (Pr) + SM</i>        | 26 weeks  |
| <b>Naik AD,</b> <sup>49</sup> 2012 (USA)<br><br><u>Study period</u><br>NR                         | <b>Patient criteria:</b> i) Uncontrolled diabetes and co-morbid, clinically elevated depressive symptoms; ii) Living in rural areas.<br><b>Sample size:</b> 8<br><b>Mean age (SD):</b> 62.1 (2.85)<br><b>Setting:</b> Patients' homes                                                                                                                           | Pilot study   | <b>Treatment:</b> Physiological measures<br><b>Treatment:</b> Clinical assessment<br><b>Health status and well being:</b> Psychological health of patient                                                                                                                                    | Depression + Diabetes                       | Healthy Outcomes through Patient Empowerment (HOPE)                             | <b>Self-management; Education; Self-management:</b> <i>CP + ED (Pt + Pr) + FR + SM + TEAM</i> | 26 weeks  |
| <b>Noel HC,</b> <sup>50</sup> 2004 (USA)<br><br><u>Study period</u><br>NR                         | <b>Patient criteria:</b> i) Documented high use of healthcare resources; ii) Barriers to accessing healthcare services due to geographic, economic, physical, linguistic, technologic, and/or cultural factors.<br><b>Sample size:</b> 104<br><b>Mean age (SD):</b> 71 (NR)<br><b>Setting:</b> VA Connecticut Healthcare System                                 | RCT           | <b>Health service delivery:</b> Health economic outcomes<br><b>Health Service Delivery:</b> Service utilization<br><b>Health Status and Well Being:</b> Physical health of patient<br><b>Health Status and Well Being:</b> Psychosocial outcomes<br><b>Treatment:</b> Physiological measures | CHF + COPD + Diabetes                       | Home telemedicine (telehealth) vs. Control                                      | <b>Information and health technology; Education:</b> <i>CM + ED (Pt) + TM</i>                 | 26 weeks  |
| <b>Pols AD,</b> <sup>51</sup> 2017<br><br><u>Study period</u> Jan 2103- Nov 2015                  | <b>Patient criteria:</b> i) CHF and/or DM2, ii) sub-threshold depression (>6 PHQ-9 score), iii) not taking anti-depressants, iv) not diagnosed with a psychotic illness, cognitive impairment, major depressive disorder or bipolar disorder<br><b>Sample size:</b> 236<br><b>Mean age (SD):</b> 67.5 (10)<br><b>Setting:</b> Netherlands; primary care centres | RCT (cluster) | <b>Treatment outcomes:</b> clinical assessments                                                                                                                                                                                                                                              | DM2 and/or CHF and sub-threshold depression | Stepped Care Program (Step-Dep) vs. Usual care                                  | <b>Coordination of Care; Cognitive-behavioural:</b> <i>CPM + DM (psychosocial) + ED (pt)</i>  | 12 months |
| <b>Schnipper JL,</b> <sup>53</sup> 2010 (USA)<br><br><u>Study period</u><br>March – November 2007 | <b>Patient criteria:</b> i) With CAD or DM on the electronic health record (EHR) problem list. ii) Had a visit with a primary care physician (PCP)                                                                                                                                                                                                              | RCT           | <b>Knowledge and Understanding:</b> Provider level of knowledge or skills                                                                                                                                                                                                                    | CVD + Diabetes                              | CDSS (CAD/DM SmartForm) vs. Usual care                                          | <b>Information and health technology; Education:</b> <i>DM + ED (Pr) + REM (Pr)</i>           | 4 weeks   |

|                                                                                                     |                                                                                                                                                                                                                                                                                                                                                                                                               |                                   |                                                                                                                     |                                     |                                                                                             |                                                                                                         |            |
|-----------------------------------------------------------------------------------------------------|---------------------------------------------------------------------------------------------------------------------------------------------------------------------------------------------------------------------------------------------------------------------------------------------------------------------------------------------------------------------------------------------------------------|-----------------------------------|---------------------------------------------------------------------------------------------------------------------|-------------------------------------|---------------------------------------------------------------------------------------------|---------------------------------------------------------------------------------------------------------|------------|
|                                                                                                     | <p>belonging to one of the study practices from the date the practice was given the Smart Form until the end of the study.</p> <p><b>Sample size:</b> 7009<br/> <b>Mean age (SD):</b> NR (NR)<br/> <b>Setting:</b> 10 adult primary care practices at Brigham and Women's Hospital, and Massachusetts General Hospital</p>                                                                                    |                                   |                                                                                                                     |                                     |                                                                                             |                                                                                                         |            |
| <p><b>Sran M,<sup>54</sup> 2016</b></p> <p><u>Study period</u><br/> September 2006 – April 2011</p> | <p><b>Patient criteria:</b> i) postmenopausal women, ii) 55 years and older, iii) osteoporosis OR low bone mass, iv) urinary incontinence<br/> <b>Sample size:</b> 48<br/> <b>Mean age (SD):</b> NR (NR)<br/> <b>Setting:</b> osteoporosis clinic (outpatient)</p>                                                                                                                                            | RCT                               | <p><b>Treatment:</b> Clinical assessment<br/> <b>Skills acquisition:</b> Self-care skills</p>                       | Osteoporosis + Urinary Incontinence | Physical therapy vs. control (osteoporosis education)                                       | <p><b>Coordination of care; Education; Self-management:</b><br/> DM + ED (Pt) + SM</p>                  | 1 year     |
| <p><b>Unutzer J,<sup>55</sup> 2008 (USA)</b></p> <p><u>Study period</u><br/> Unclear</p>            | <p><b>Patient criteria:</b> i) Depression severity score <math>\geq 10</math> on PHQ-9; ii) Score <math>\geq 2</math> on at least one of two core depression symptoms (depressed mood or anhedonia); iii) Self-reported functional impairment from osteoarthritis pain.<br/> <b>Sample size:</b> 13<br/> <b>Mean age (SD):</b> 72.2 (8.5)<br/> <b>Setting:</b> University affiliated primary care clinics</p> | Controlled before/after study     | <p><b>Treatment:</b> Clinical assessment<br/> <b>Skills acquisition:</b> Self-care skills</p>                       | Depression + Osteoarthritis         | Adapted IMPACT-DP intervention (nurse administered case management supporting primary care) | <p><b>Coordination of care; Education; Self-management:</b><br/> CM + DM + ED (Pt + Pr) + SM + TEAM</p> | 26 weeks   |
| <p><b>White KM,<sup>56</sup> 2012 (Australia)</b></p> <p><u>Study period</u><br/> NR</p>            | <p><b>Patient criteria:</b> i) Predominantly older adults diagnosed with Type 2 diabetes or CVD; ii) Voluntarily recruited from seven community health centres in Queensland, Australia.<br/> <b>Sample size:</b> 183<br/> <b>Mean age (SD):</b> 61.17 (8.81)<br/> <b>Setting:</b> Patients from seven community health centres in Queensland, Australia</p>                                                  | RCT                               | <p><b>Health behaviour:</b><br/> Health enhancing life-style or behavior outcomes</p>                               | CVD + Diabetes                      | Extended-Theory of Planned Behavior (TPB) Intervention vs. Control                          | <p><b>Cognitive-behavioural; Education; Self-management:</b><br/> ED (Pt + Pr) + SM</p>                 | 6 weeks    |
| <p><b>Whitten P,<sup>57</sup> 2007 (USA)</b></p> <p><u>Study period</u><br/> 2002 - 2003</p>        | <p><b>Patient criteria:</b> i) Diagnosed with COPD and/or CHF; ii) Prescribed home health care services from the Marquette General Health System in Michigan.<br/> <b>Sample size:</b> 67</p>                                                                                                                                                                                                                 | Mixed-methods (RCT + Qualitative) | <p><b>Evaluation of care:</b><br/> Satisfaction<br/> <b>Health status and well-being:</b> Psychosocial outcomes</p> | CHF + COPD                          | Home telehealth vs. Control (conventional home care)                                        | <p><b>Information and health technology:</b><br/> DM + TM</p>                                           | 10.7 weeks |

|                                                                                                                                                |                                                                                                                                                                                                                                                                                                                                                                                                                                                                                                                                                                                                                                    |     |                                                                                                                                                                                                                                                                                                                                                                                                                                                    |                       |                                                                                         |                                                                                          |          |
|------------------------------------------------------------------------------------------------------------------------------------------------|------------------------------------------------------------------------------------------------------------------------------------------------------------------------------------------------------------------------------------------------------------------------------------------------------------------------------------------------------------------------------------------------------------------------------------------------------------------------------------------------------------------------------------------------------------------------------------------------------------------------------------|-----|----------------------------------------------------------------------------------------------------------------------------------------------------------------------------------------------------------------------------------------------------------------------------------------------------------------------------------------------------------------------------------------------------------------------------------------------------|-----------------------|-----------------------------------------------------------------------------------------|------------------------------------------------------------------------------------------|----------|
|                                                                                                                                                | <p><b>Mean age (SD):</b> 76 (13)<br/> <b>Setting:</b> Marquette General Health System in Michigan's Upper Peninsula</p>                                                                                                                                                                                                                                                                                                                                                                                                                                                                                                            |     |                                                                                                                                                                                                                                                                                                                                                                                                                                                    |                       |                                                                                         |                                                                                          |          |
| <p><b>Williams A,</b><sup>58</sup> 2012a (Australia)<br/><br/> <u>Study period</u><br/> 2008 - 2009</p>                                        | <p><b>Patient criteria:</b> i) Combined diagnosis of Stages 2-4 CKD (15 &lt; eGFR ≤60), Type 1 or 2 diabetes, and evidence of CVD (hypertension, heart failure, hyperlipidaemia) in the medical record; ii) Requires routine outpatient specialist clinic appointments at two nephrology outpatient clinics; iii) Age ≥ 18years, and of either gender; iv) Non-English speaking background with preference to speak Greek, Italian or Vietnamese at home.<br/> <b>Sample size:</b> 48<br/> <b>Mean age (SD):</b> 74.31 (8.37)<br/> <b>Setting:</b> Nephrology outpatient clinics at two public tertiary metropolitan hospitals</p> | RCT | <p><b>Treatment:</b> Physiological measures<br/> <b>Health Behaviour:</b> Compliance<br/> <b>Skills acquisition:</b> Self-care skills</p>                                                                                                                                                                                                                                                                                                          | CKD + Diabetes        | MESMI (Medication Self-Management Intervention) vs. Usual care                          | <p><b>Self-management; Education:</b><br/> <i>DM + ED (Pt + Pr) + SM</i></p>             | 39 weeks |
| <p><b>Williams JW,</b><sup>60</sup> 2004 (USA)<br/><br/> <u>Study period</u><br/> July 1999 to August 2001</p>                                 | <p><b>Patient criteria:</b> depressed pts with diabetes, &gt; 60 years older<br/> <b>Sample size:</b> 1801<br/> <b>Mean age (SD):</b> 71.2 (7.5)<br/> <b>Setting:</b> Seven study sites representing 8 diverse health care organizations with a total of 18 primary care clinics in 5 states</p>                                                                                                                                                                                                                                                                                                                                   | RCT | <p><b>Health behaviour:</b> Compliance<br/> <b>Health behaviour:</b> Health enhancing life-style or behaviour outcomes<br/> <b>Health service delivery:</b> Health economic outcomes<br/> <b>Health status and well-being:</b> Physical health of patient<br/> <b>Health status and well-being:</b> Psychological health of patient<br/> <b>Treatment outcomes:</b> Clinical assessment<br/> <b>Treatment outcomes:</b> Physiological measures</p> | Depression + Diabetes | IMPACT intervention vs. Usual care                                                      | <p><b>Coordination of care; Education:</b><br/> <i>CP + DM + ED (Pt + Pr) + TEAM</i></p> | 52 weeks |
| <p><b>Wu CJ,</b><sup>61</sup> 2012 (country and study period not reported)<br/><br/> <u>Study period</u><br/> August 2009 to December 2010</p> | <p><b>Patient criteria:</b> aged over 18 years, admitted to CCU with a critical cardiac event, had a previous diagnosis of type 2 diabetes, had a mobile phone and were able to read and speak English<br/> <b>Sample size:</b> 28<br/> <b>Mean age (SD):</b> intervention 62.7 years (13); intervention 71.5 years (9.9)</p>                                                                                                                                                                                                                                                                                                      | RCT | <p><b>Knowledge and understanding:</b> Patient knowledge acquisition<br/> <b>Skills acquisition:</b> Self-care skills</p>                                                                                                                                                                                                                                                                                                                          | CHF + Diabetes        | Peer support based Cardiac-Diabetes Self-Management Program (Peer-CDSMP) vs. Usual care | <p><b>Self-management; Education:</b><br/> <i>ED (Pt + Pr) + REM (Pt) + SM</i></p>       | 2 weeks  |

|  |                                                                          |  |  |  |  |  |  |
|--|--------------------------------------------------------------------------|--|--|--|--|--|--|
|  | <b>Setting:</b> CCU at an acute hospital and then the participant's home |  |  |  |  |  |  |
|--|--------------------------------------------------------------------------|--|--|--|--|--|--|

\*SD = Standard deviation; NR = Not Reported; RCT = Randomized Controlled Trial; HAM-D = Hamilton depression rating scale; COPD = Chronic obstructive pulmonary disease; CHD = Coronary heart disease; CHF = Congestive heart failure; CVD = Cardiovascular disease; CKD = Chronic kidney disease; DSM-IV = Diagnostic and statistical manual of mental disorders, fourth edition; AMTS = Abbreviated mental test score; EBAS-DEP = Even briefer assessment scale for depression; BEHAVE-AD = Behavioural pathology in Alzheimer's disease; MINI = Mini international neuropsychiatric interview ; SIGH-D = Structured interview guide for the Hamilton depression rating scale (HAM-D); MMSE = Mini mental state examination; PHQ-9 = Patient health questionnaire; RCT = Randomized Controlled Trial; DSM-IV = Diagnostic and statistical manual of mental disorders, fourth edition; MINI = Mini international neuropsychiatric interview;

† **EPOC** Outcome categorization taxonomy
